# Supplementary material for: In situ conversion of sub-4 nm Co(OH)2 nanosheet arrays from phytic acid-derived Co3(HPO4)2(OH)2 for superior high loading supercapacitors
Source: Royal Society of Chemistry journal article supplement (doi:10.1039/c8ta05212c), 2018-01-01
Supplement: c8ta05212c1.pdf [file c8ta05212c1.pdf]

## Supporting Information

### ***In situ* Conversion of Sub-4 nm Co(OH)<sub>2</sub> Nanosheet Arrays from Phytic Acid-derived Co<sub>3</sub>(HPO<sub>4</sub>)<sub>2</sub>(OH)<sub>2</sub> for Superior High Loading Supercapacitors**

Shengqi Wang<sup>a</sup>, Zhaoqiang Zhu<sup>a</sup>, Pengwei Li<sup>a</sup>, Chunhua Zhao<sup>a</sup>, Chongjun Zhao<sup>a\*</sup>, Hui Xia<sup>b\*\*</sup>

<sup>a</sup>Key Laboratory for Ultrafine Materials of Ministry of Education, Shanghai Key Laboratory of Advanced Polymeric Materials, School of Materials Science and Engineering, East China University of Science and Technology, Shanghai 200237, P.R. China, Tel: +86-21-6425 0838, Fax: +86-21-6425 0838, E-mail:

[chongjunzhao@ecust.edu.cn](mailto:chongjunzhao@ecust.edu.cn)

<sup>b</sup>School of Materials Science and Engineering, Nanjing University of Science and Technology, Nanjing 210094, China, E-mail: [xiahui@njust.edu.cn](mailto:xiahui@njust.edu.cn)

#### **\* Corresponding author:**

Chongjun Zhao

Key Laboratory for Ultrafine Materials of Ministry of Education,

Shanghai Key Laboratory of Advanced Polymeric Materials,

School of Materials Science and Engineering

East China University of Science and Technology

Shanghai 200237, P.R. China

Tel: 0086-21-6425 0838

Fax: 0086-21-6425 0838

E-mail: [chongjunzhao@ecust.edu.cn](mailto:chongjunzhao@ecust.edu.cn)

**\*\* Corresponding author:**

Hui Xia (Prof.)

School of Materials Science and Engineering

Nanjing University of Science and Technology

Nanjing 210094, China

E-mail:

[xiahui@njust.edu.cn](mailto:xiahui@njust.edu.cn)

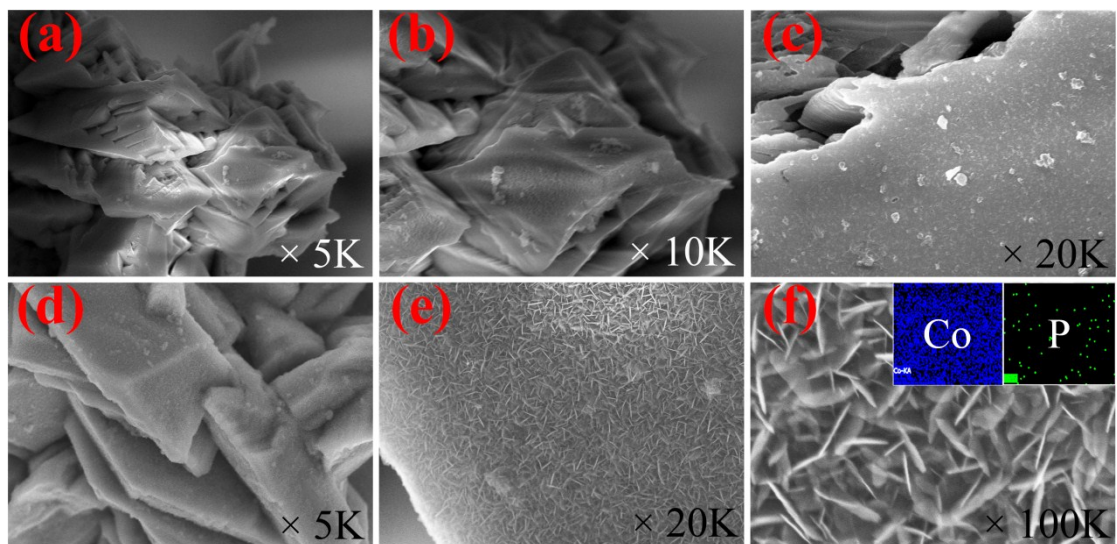

**Fig. S1.** SEM images of (a-c) CP@CoF, (d-f) C@CoF and (inset of f) EDS mapping of C@CoF.

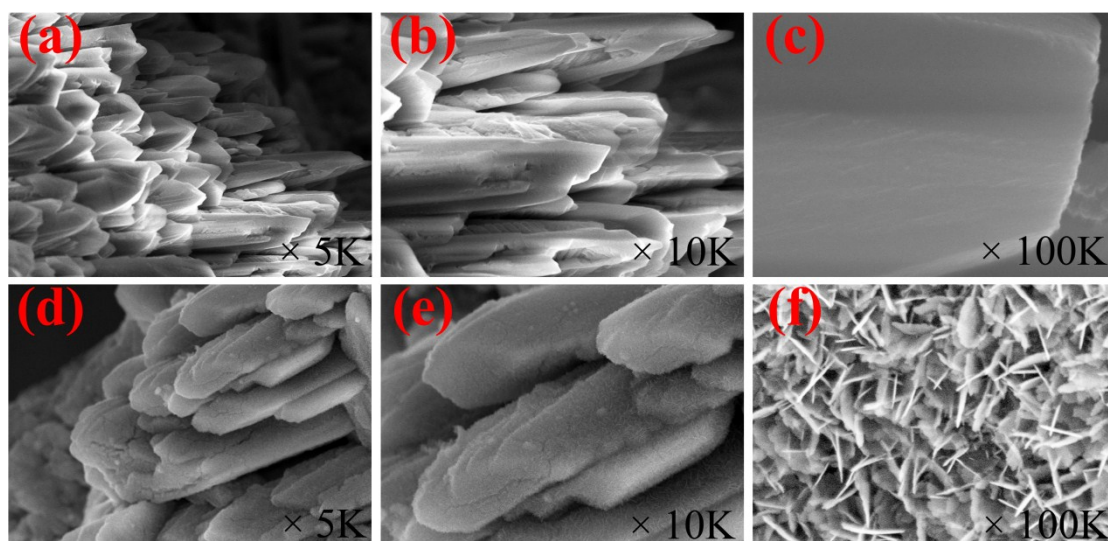

**Fig. S2.** SEM images of (a-c) NCP@CoF, (d-f) NC@CoF.

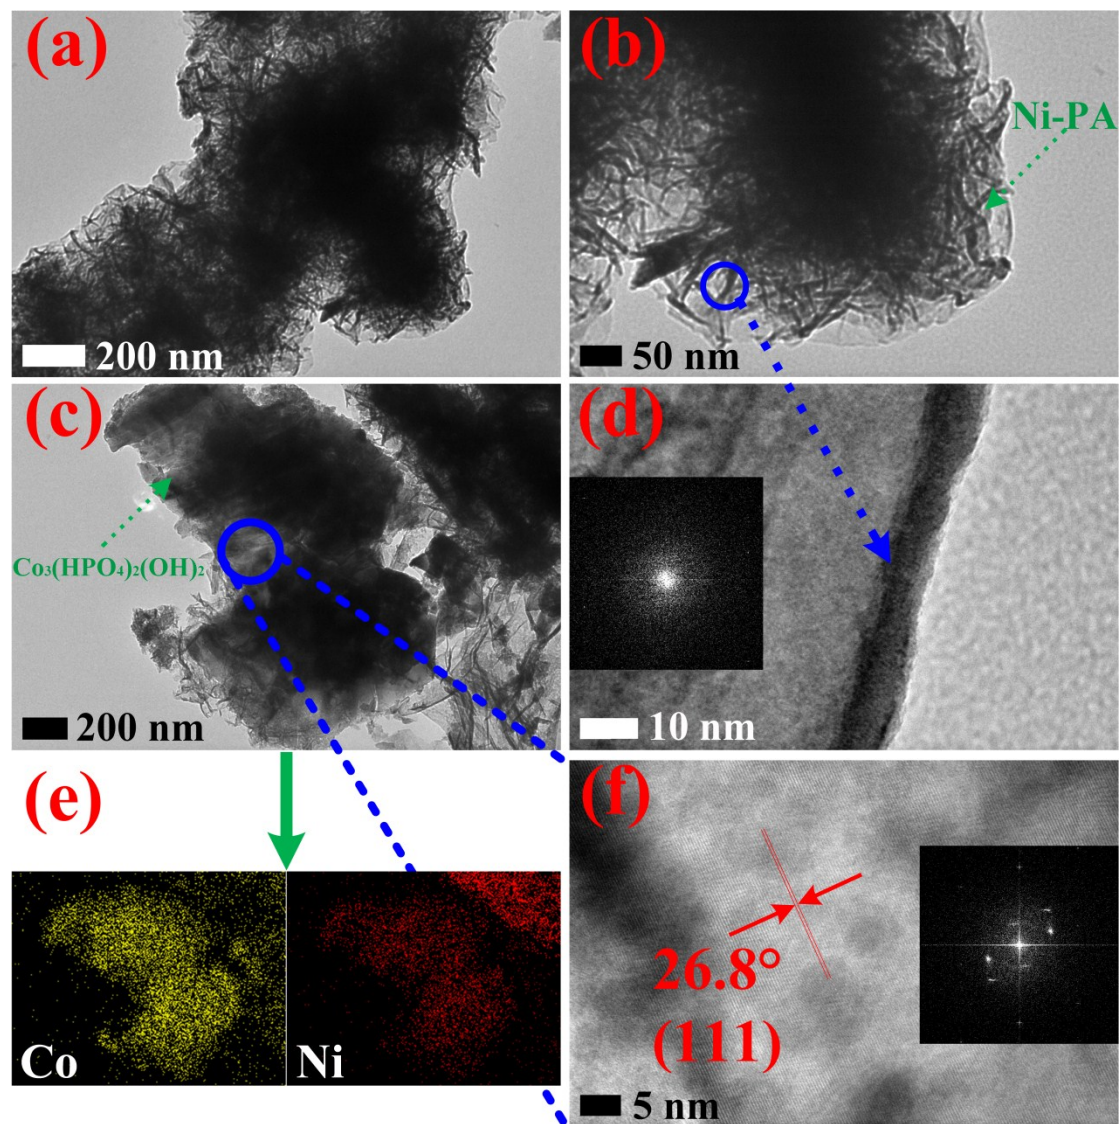

**Fig. S3.** TEM tests of SNCP@CoF: (a-b) Images of Ni-PA nanofilms covered  $\text{Co}_3(\text{HPO}_4)_2(\text{OH})_2$  blocks, (c) Image of exposed  $\text{Co}_3(\text{HPO}_4)_2(\text{OH})_2$  blocks and Ni-PA nanofilms at the edge of blocks, (d) HR-TEM and SAED (inset) of Ni-PA nanofilms, (e) EDS mapping of SNCP@CoF (corresponding to Fig.S3c), (f) HRTEM images and SADE (inset) of  $\text{Co}_3(\text{HPO}_4)_2(\text{OH})_2$  blocks.

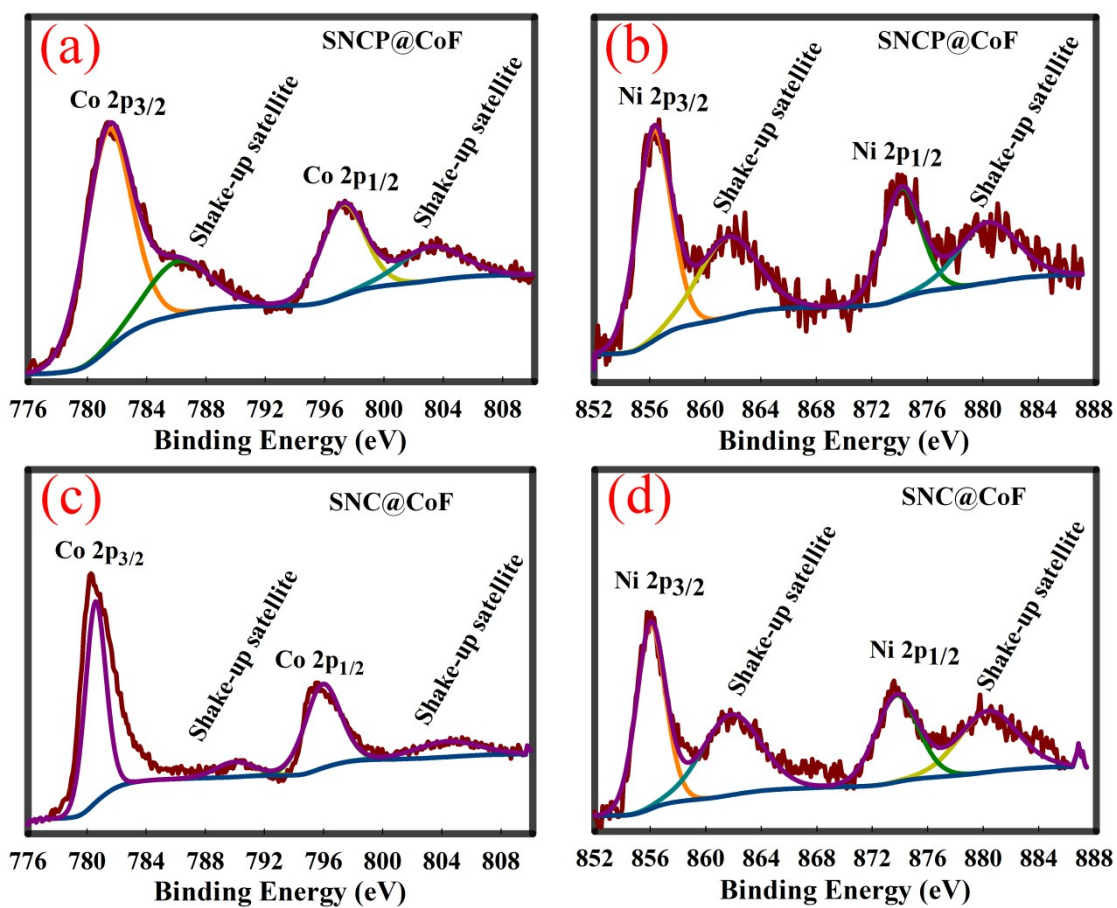

**Fig. S4.** XPS spectra of (a, b) Co 2p and Ni 2p patterns of SNCP@CoF, (c, d) Co 2p and Ni 2p patterns of SNC@CoF.



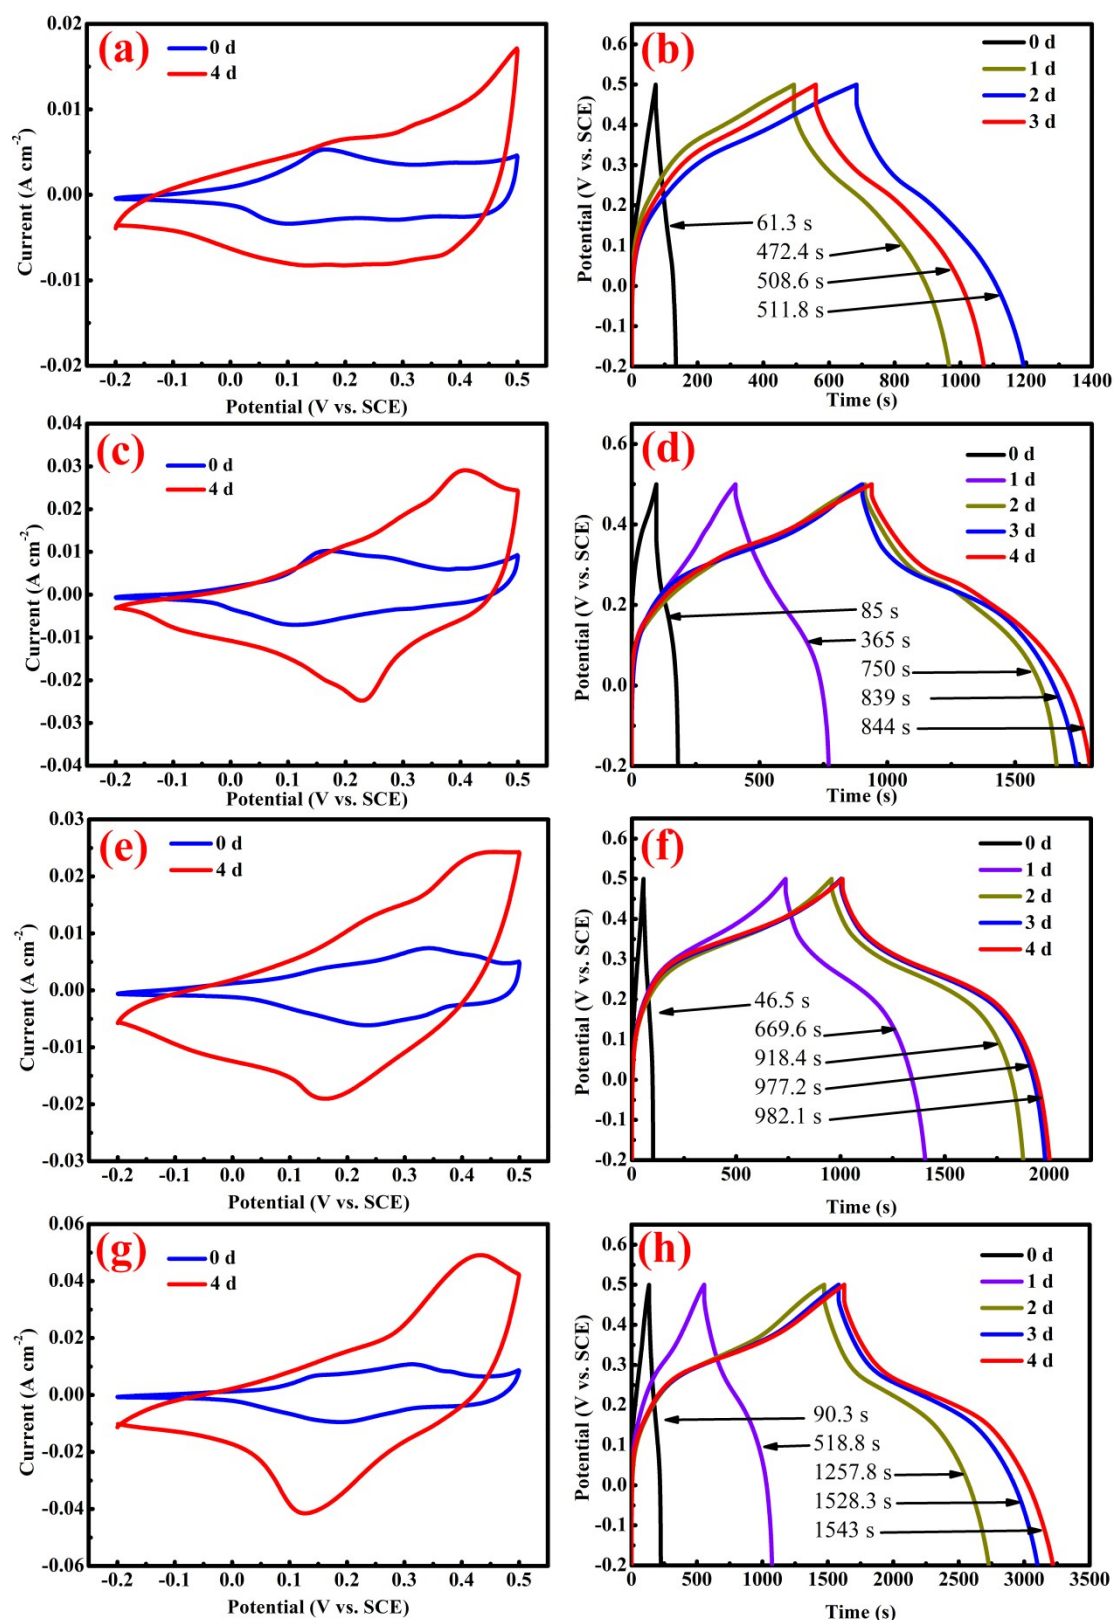

**Fig. S5.** CV and GCD curves for the effects of conversion durations on those samples:

(a, b) CP@CoF, (c, d) SCP@CoF, (e, f) NCP@CoF and (g, h) SNCP@CoF.

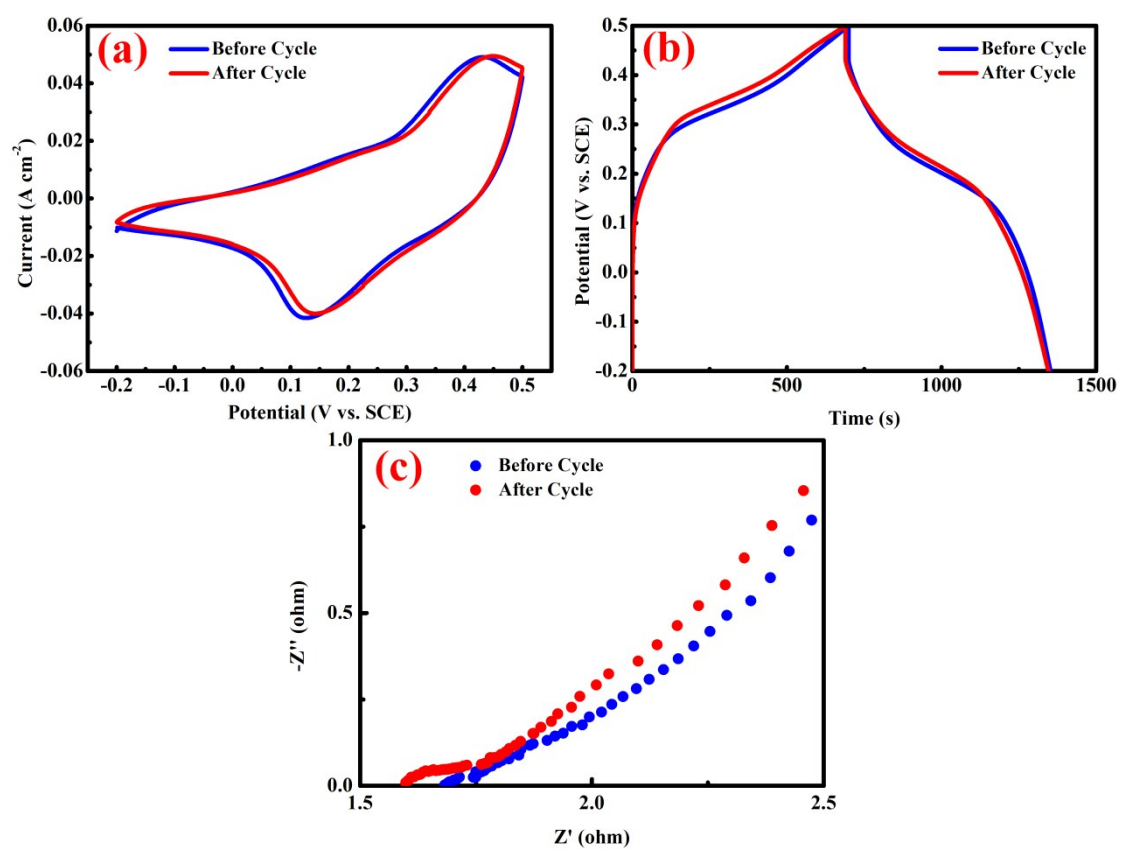

**Fig. S6.** (a-c) CV, GCD and EIS curves of SNC@CoF electrode before and after 20,000 cycles.
